# Supplementary material for: Randomized controlled trial of early aerobic exercise following sport-related concussion: Progressive percentage of age-predicted maximal heart rate versus usual care
Source: PubMed Central journal article supplement (PMC9778585; doi:10.1371/journal.pone.0276336), 2022-12-22
Supplement: pone.0276336.s007.pdf [file pone.0276336.s007.pdf]

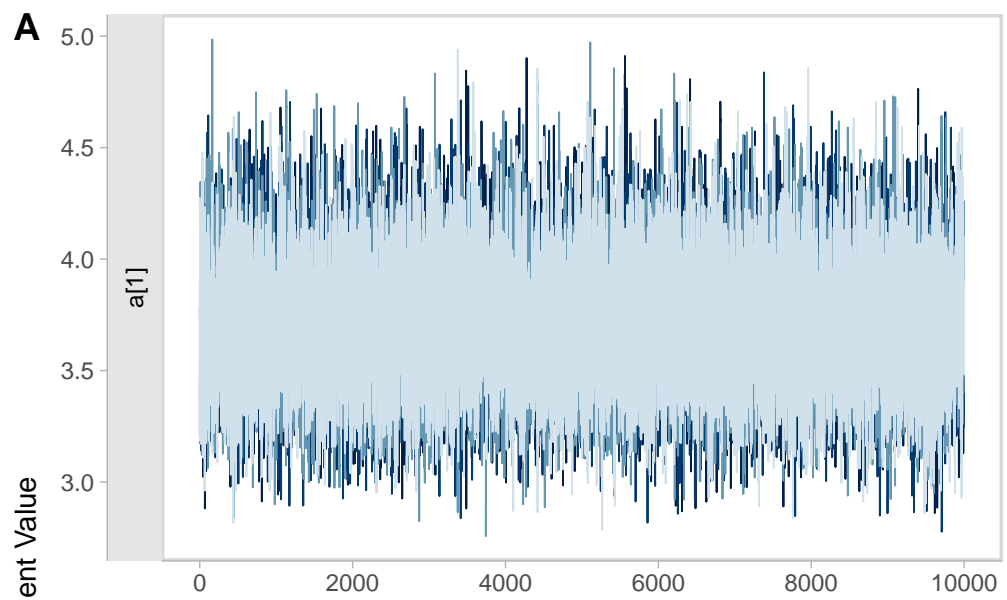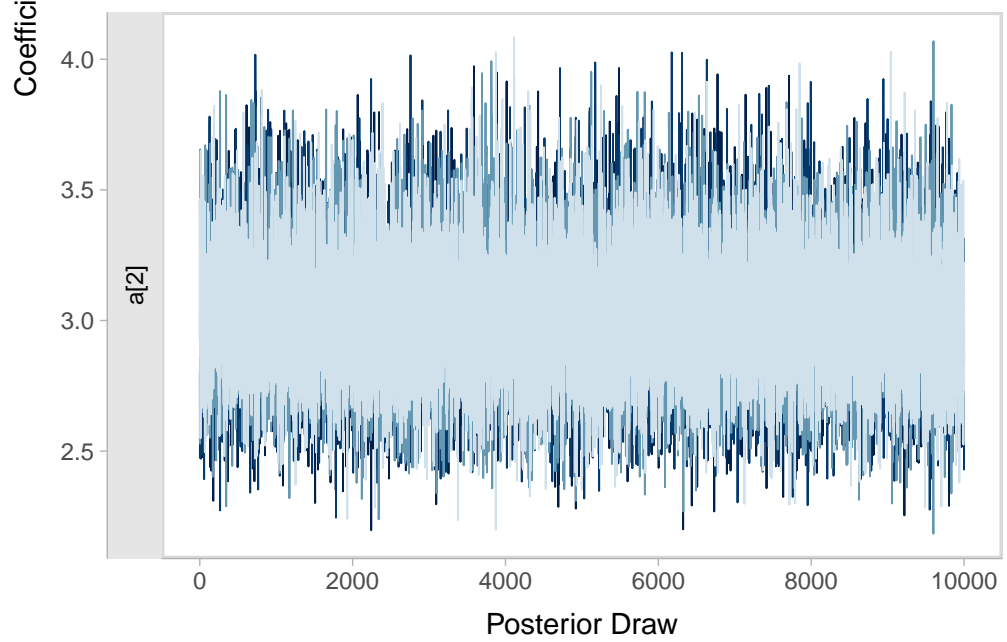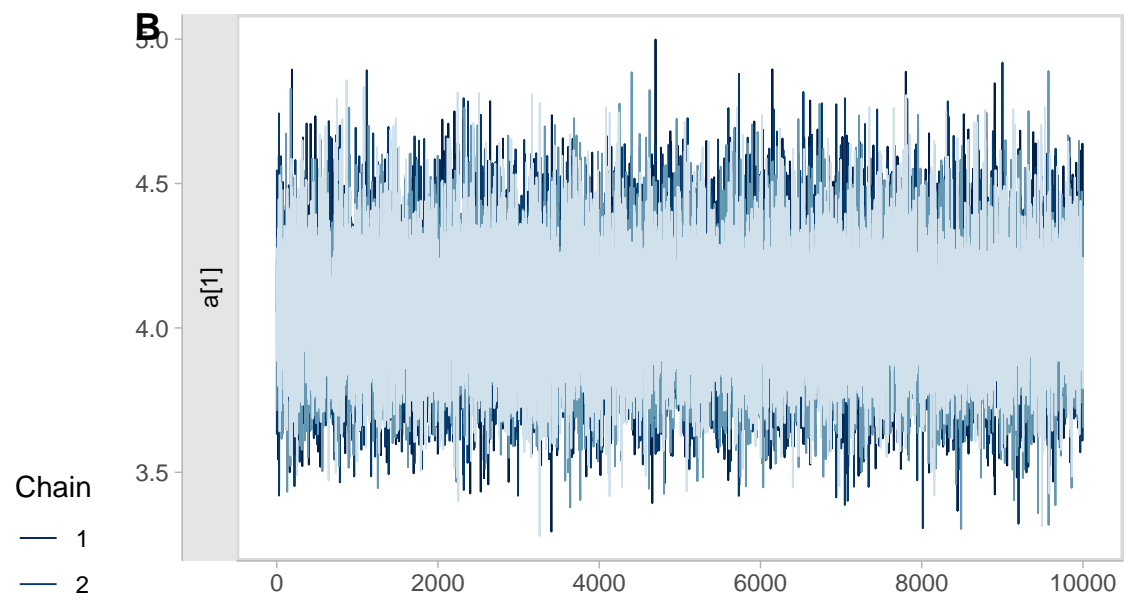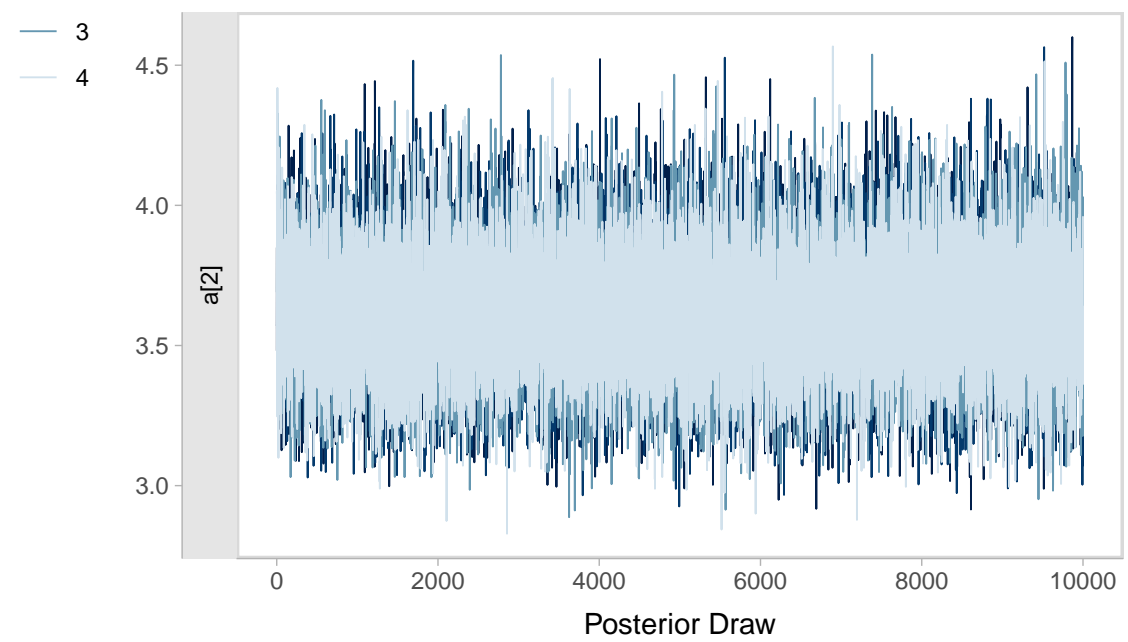

Chain  
— 1  
— 2  
— 3  
— 4

Chain  
— 1  
— 2  
— 3  
— 4
